# Supplementary material
Source: PubMed Central journal article supplement (PMC1955321)
Supplement: hesr0041-2219-ts1.pdf [file hesr0041-2219-ts1.pdf]

**Table E1. Coefficients for the simple logistic regression on terminal ICU admission**

| Variable                            | Estimate  | Standard Error | Lower 95% CI | Upper 95% CI | Pr > ChiSq |
|-------------------------------------|-----------|----------------|--------------|--------------|------------|
| Age 18-24                           | 0.5761    | 0.0881         | 0.4035       | 0.7487       | <.0001     |
| Age 25-34                           | 0.5262    | 0.0532         | 0.4218       | 0.6305       | <.0001     |
| Age 35-54                           | 0.4906    | 0.0275         | 0.4367       | 0.5444       | <.0001     |
| Age 55-64                           | 0.4414    | 0.026          | 0.3904       | 0.4923       | <.0001     |
| Age 65-69                           | 0.1339    | 0.0231         | 0.0886       | 0.1792       | <.0001     |
| Age 70-74                           | reference |                |              |              |            |
| Age 75-79                           | -0.1408   | 0.0193         | -0.1787      | -0.1029      | <.0001     |
| Age 80-84                           | -0.3725   | 0.0192         | -0.4101      | -0.3349      | <.0001     |
| Age 85-89                           | -0.6384   | 0.0198         | -0.6773      | -0.5996      | <.0001     |
| Age 90-94                           | -1.0316   | 0.023          | -1.0767      | -0.9865      | <.0001     |
| Age >=95                            | -1.3855   | 0.033          | -1.4502      | -1.3208      | <.0001     |
| Female                              | reference |                |              |              |            |
| Male                                | 0.1511    | 0.0121         | 0.1274       | 0.1748       | <.0001     |
| Medicare                            | reference |                |              |              |            |
| Medicaid                            | -0.2378   | 0.033          | -0.3025      | -0.1732      | <.0001     |
| Commercial                          | -0.2435   | 0.0174         | -0.2777      | -0.2094      | <.0001     |
| Other insured                       | -0.4009   | 0.0221         | -0.4442      | -0.3575      | <.0001     |
| Uninsured                           | 0.1103    | 0.0341         | 0.0434       | 0.1772       | 0.0012     |
| Urgent medical admission            | reference |                |              |              |            |
| Urgent/emergent surgical admission  | 1.4758    | 0.036          | 1.4054       | 1.5463       | <.0001     |
| Elective surgical admission         | 1.3646    | 0.0168         | 1.3316       | 1.3976       | <.0001     |
| White                               | reference |                |              |              |            |
| Black                               | 0.269     | 0.0252         | 0.2197       | 0.3183       | <.0001     |
| Hispanic                            | 0.4245    | 0.0343         | 0.3573       | 0.4916       | <.0001     |
| Others                              | -0.0032   | 0.0231         | -0.0484      | 0.0421       | 0.891      |
| BLACK*MALE                          | -0.121    | 0.0334         | -0.1864      | -0.0556      | 0.0003     |
| HISPANIC*MALE                       | -0.155    | 0.0458         | -0.2447      | -0.0653      | 0.0007     |
| OTHER*MALE                          | 0.0126    | 0.0312         | -0.0486      | 0.0737       | 0.6867     |
| Diabetes                            | -0.0684   | 0.0141         | -0.096       | -0.0408      | <.0001     |
| Diabetes with chronic complications | -0.2299   | 0.0309         | -0.2904      | -0.1694      | <.0001     |
| Chronic pulmonary disease           | 0.0856    | 0.014          | 0.0581       | 0.1131       | <.0001     |
| Dementia                            | -0.9391   | 0.0326         | -1.0031      | -0.8751      | <.0001     |
| HIV or AIDS                         | -0.7453   | 0.0384         | -0.8206      | -0.67        | <.0001     |

|                             |         |        |         |         |        |
|-----------------------------|---------|--------|---------|---------|--------|
| Myocardial infarction       | -0.2013 | 0.0311 | -0.2623 | -0.1403 | <.0001 |
| Mild liver disease          | -0.1079 | 0.0286 | -0.164  | -0.0518 | 0.0002 |
| Cerebrovascular disease     | -0.7735 | 0.0292 | -0.8307 | -0.7163 | <.0001 |
| Metastatic solid tumor      | -1.203  | 0.0196 | -1.2414 | -1.1646 | <.0001 |
| BLACK*METS                  | 0.1615  | 0.0504 | 0.0628  | 0.2603  | 0.0013 |
| HISPANIC*METS               | -0.3696 | 0.0737 | -0.5141 | -0.2251 | <.0001 |
| OTHER*METS                  | 0.0913  | 0.0483 | -0.0033 | 0.1859  | 0.0585 |
| Other malignancy            | -0.7766 | 0.0168 | -0.8096 | -0.7437 | <.0001 |
| BLACK*MALIG                 | -0.1176 | 0.0451 | -0.206  | -0.0291 | 0.0092 |
| HISPANIC*MALIG              | -0.0501 | 0.0623 | -0.1721 | 0.0719  | 0.4209 |
| OTHER*MALIG                 | -0.0709 | 0.0417 | -0.1527 | 0.0108  | 0.0888 |
| Peripheral vascular disease | -0.3434 | 0.0305 | -0.4032 | -0.2836 | <.0001 |
| BLACK*PVD                   | -0.3205 | 0.0821 | -0.4813 | -0.1597 | <.0001 |
| HISPANIC*PVD                | -0.1573 | 0.1252 | -0.4026 | 0.0881  | 0.209  |
| OTHER*PVD                   | -0.0162 | 0.0835 | -0.1798 | 0.1474  | 0.8464 |
| Rheumatologic disease       | -0.1713 | 0.042  | -0.2536 | -0.0889 | <.0001 |

**Table E2. Coefficients for the GEE logistic regression on terminal ICU admission**

| Variable                            | Estimate  | Standard Error | Lower 95% CI | Upper 95% CI | Pr > ChiSq |
|-------------------------------------|-----------|----------------|--------------|--------------|------------|
| Age 18-24                           | 0.5612    | 0.1083         | 0.3488       | 0.7735       | <.0001     |
| Age 25-34                           | 0.528     | 0.0778         | 0.3754       | 0.6805       | <.0001     |
| Age 35-54                           | 0.5015    | 0.0531         | 0.3974       | 0.6055       | <.0001     |
| Age 55-64                           | 0.4545    | 0.0479         | 0.3606       | 0.5483       | <.0001     |
| Age 65-69                           | 0.1268    | 0.0217         | 0.0843       | 0.1692       | <.0001     |
| Age 70-74                           | reference |                |              |              |            |
| Age 75-79                           | -0.1371   | 0.0182         | -0.1728      | -0.1014      | <.0001     |
| Age 80-84                           | -0.3592   | 0.0184         | -0.3953      | -0.323       | <.0001     |
| Age 85-89                           | -0.6232   | 0.0213         | -0.665       | -0.5813      | <.0001     |
| Age 90-94                           | -1.0062   | 0.0262         | -1.0576      | -0.9548      | <.0001     |
| Age >=95                            | -1.3589   | 0.037          | -1.4315      | -1.2863      | <.0001     |
| Female                              | reference |                |              |              |            |
| Male                                | 0.1329    | 0.0117         | 0.11         | 0.1558       | <.0001     |
| Medicare                            | reference |                |              |              |            |
| Medicaid                            | -0.3219   | 0.0601         | -0.4397      | -0.204       | <.0001     |
| Commercial                          | -0.2829   | 0.0533         | -0.3874      | -0.1784      | <.0001     |
| Other insured                       | -0.4221   | 0.064          | -0.5474      | -0.2967      | <.0001     |
| Uninsured                           | -0.0261   | 0.0561         | -0.1362      | 0.0839       | 0.6418     |
| Urgent medical admission            | reference |                |              |              |            |
| Urgent/emergent surgical admission  | 1.3565    | 0.0466         | 1.2653       | 1.4478       | <.0001     |
| Elective surgical admission         | 1.2522    | 0.026          | 1.2012       | 1.3032       | <.0001     |
| White                               | reference |                |              |              |            |
| Black                               | 0.0967    | 0.0327         | 0.0325       | 0.1608       | 0.0031     |
| Hispanic                            | 0.1652    | 0.0382         | 0.0903       | 0.2402       | <.0001     |
| Others                              | 0.0756    | 0.0333         | 0.0104       | 0.1408       | 0.0231     |
| BLACK*MALE                          | -0.1131   | 0.0339         | -0.1796      | -0.0466      | 0.0009     |
| HISPANIC*MALE                       | -0.1229   | 0.0388         | -0.1989      | -0.0469      | 0.0015     |
| OTHER*MALE                          | 0.0146    | 0.0302         | -0.0446      | 0.0737       | 0.6289     |
| Diabetes                            | -0.0588   | 0.0155         | -0.0892      | -0.0283      | 0.0002     |
| Diabetes with chronic complications | -0.2203   | 0.0319         | -0.2828      | -0.1579      | <.0001     |
| Chronic pulmonary disease           | 0.0784    | 0.015          | 0.0491       | 0.1078       | <.0001     |
| Dementia                            | -0.8662   | 0.0351         | -0.9351      | -0.7974      | <.0001     |
| HIV or AIDS                         | -0.7748   | 0.0487         | -0.8703      | -0.6792      | <.0001     |

|                             |         |        |         |         |        |
|-----------------------------|---------|--------|---------|---------|--------|
| Myocardial infarction       | -0.1739 | 0.0311 | -0.2348 | -0.1131 | <.0001 |
| Mild liver disease          | -0.1218 | 0.0307 | -0.182  | -0.0615 | <.0001 |
| Cerebrovascular disease     | -0.7202 | 0.0302 | -0.7794 | -0.661  | <.0001 |
| Metastatic solid tumor      | -1.0623 | 0.031  | -1.1231 | -1.0014 | <.0001 |
| BLACK*METS                  | 0.1753  | 0.0568 | 0.064   | 0.2867  | 0.002  |
| HISPANIC*METS               | -0.3547 | 0.0774 | -0.5064 | -0.203  | <.0001 |
| OTHER*METS                  | -0.025  | 0.0912 | -0.2038 | 0.1538  | 0.7841 |
| Any malignancy              | -0.7204 | 0.021  | -0.7616 | -0.6792 | <.0001 |
| BLACK*MALIG                 | -0.0981 | 0.0461 | -0.1886 | -0.0077 | 0.0335 |
| HISPANIC*MALIG              | 0.0136  | 0.0529 | -0.0901 | 0.1172  | 0.7978 |
| OTHER*MALIG                 | -0.0556 | 0.0473 | -0.1483 | 0.037   | 0.2393 |
| Peripheral vascular disease | -0.3204 | 0.0289 | -0.377  | -0.2638 | <.0001 |
| BLACK*PVD                   | -0.2589 | 0.0794 | -0.4146 | -0.1032 | 0.0011 |
| HISPANIC*PVD                | -0.1113 | 0.1217 | -0.3499 | 0.1272  | 0.3605 |
| OTHER*PVD                   | -0.0196 | 0.084  | -0.1842 | 0.145   | 0.8153 |
| Rheumatologic disease       | -0.1441 | 0.0414 | -0.2254 | -0.0629 | 0.0005 |
| Renal disease               | 0.0967  | 0.0327 | 0.0325  | 0.1608  | 0.0031 |

**Table E3. Coefficients for the fixed effects logistic regression on terminal ICU admission (individual hospital coefficients not shown)**

| Variable                            | Estimate  | Standard Error | Lower 95% CI | Upper 95% CI | Pr > ChiSq |
|-------------------------------------|-----------|----------------|--------------|--------------|------------|
| Age 18-24                           | 0.636917  | 0.092687       | 0.455254     | 0.81858      | <0.0001    |
| Age 25-34                           | 0.591942  | 0.055531       | 0.483103     | 0.700781     | <0.0001    |
| Age 35-54                           | 0.552121  | 0.028911       | 0.495456     | 0.608786     | <0.0001    |
| Age 55-64                           | 0.497661  | 0.027303       | 0.444148     | 0.551174     | <0.0001    |
| Age 65-69                           | 0.137095  | 0.023922       | 0.090208     | 0.183982     | <0.0001    |
| Age 70-74                           | reference |                |              |              |            |
| Age 75-79                           | -0.14957  | 0.020014       | -0.1888      | -0.11034     | <0.0001    |
| Age 80-84                           | -0.38866  | 0.019868       | -0.4276      | -0.34972     | <0.0001    |
| Age 85-89                           | -0.67572  | 0.020599       | -0.71609     | -0.63534     | <0.0001    |
| Age 90-94                           | -1.08841  | 0.024018       | -1.13548     | -1.04134     | <0.0001    |
| Age >=95                            | -1.47051  | 0.034411       | -1.53795     | -1.40306     | <0.0001    |
| Female                              | reference |                |              |              |            |
| Male                                | 0.141568  | 0.012564       | 0.116944     | 0.166193     | <0.0001    |
| Medicare                            | reference |                |              |              |            |
| Medicaid                            | -0.36359  | 0.034905       | -0.43201     | -0.29518     | <0.0001    |
| Commercial                          | -0.31136  | 0.018843       | -0.34829     | -0.27443     | <0.0001    |
| Other insured                       | -0.46327  | 0.023909       | -0.51013     | -0.41641     | <0.0001    |
| Uninsured                           | -0.03683  | 0.036983       | -0.10931     | 0.035659     | 0.319      |
| Urgent medical admission            | reference |                |              |              |            |
| Urgent/emergent surgical admission  | 1.463129  | 0.037089       | 1.390436     | 1.535823     | <0.0001    |
| Elective surgical admission         | 1.355001  | 0.017345       | 1.321006     | 1.388996     | <0.0001    |
| White                               | reference |                |              |              |            |
| Black                               | 0.070712  | 0.027322       | 0.017163     | 0.124261     | 0.01       |
| Hispanic                            | 0.13305   | 0.040167       | 0.054325     | 0.211776     | 0.001      |
| Others                              | 0.090164  | 0.03031        | 0.030757     | 0.149571     | 0.003      |
| BLACK*MALE                          | -0.11337  | 0.034534       | -0.18106     | -0.04569     | 0.001      |
| HISPANIC*MALE                       | -0.12091  | 0.047511       | -0.21403     | -0.02779     | 0.011      |
| OTHER*MALE                          | 0.018041  | 0.032357       | -0.04538     | 0.08146      | 0.577      |
| Diabetes                            | -0.0629   | 0.014596       | -0.0915      | -0.03429     | <0.0001    |
| Diabetes with chronic complications | -0.24299  | 0.031981       | -0.30567     | -0.18031     | <0.0001    |
| Chronic pulmonary disease           | 0.085377  | 0.014635       | 0.056694     | 0.11406      | <0.0001    |
| Dementia                            | -0.91457  | 0.033901       | -0.98101     | -0.84812     | <0.0001    |

|                             |          |          |          |          |         |
|-----------------------------|----------|----------|----------|----------|---------|
| HIV or AIDS                 | -0.87684 | 0.040198 | -0.95563 | -0.79806 | <0.0001 |
| Myocardial infarction       | -0.18496 | 0.03236  | -0.24839 | -0.12154 | <0.0001 |
| Mild liver disease          | -0.13381 | 0.029679 | -0.19198 | -0.07564 | <0.0001 |
| Cerebrovascular disease     | -0.77035 | 0.030399 | -0.82993 | -0.71077 | <0.0001 |
| Metastatic solid tumor      | -1.19071 | 0.020366 | -1.23063 | -1.15079 | <0.0001 |
| BLACK*METS                  | 0.187149 | 0.052254 | 0.084733 | 0.289566 | <0.0001 |
| HISPANIC*METS               | -0.35691 | 0.077009 | -0.50784 | -0.20598 | <0.0001 |
| OTHER*METS                  | 0.059272 | 0.049826 | -0.03838 | 0.156929 | 0.234   |
| Any malignancy              | -0.77284 | 0.01749  | -0.80712 | -0.73856 | <0.0001 |
| BLACK*MALIG                 | -0.11352 | 0.04687  | -0.20538 | -0.02165 | 0.015   |
| HISPANIC*MALIG              | 0.001794 | 0.064963 | -0.12553 | 0.129119 | 0.978   |
| OTHER*MALIG                 | -0.05172 | 0.043223 | -0.13643 | 0.033    | 0.232   |
| Peripheral vascular disease | -0.34685 | 0.031593 | -0.40877 | -0.28492 | <0.0001 |
| BLACK*PVD                   | -0.27638 | 0.084728 | -0.44244 | -0.11032 | 0.001   |
| HISPANIC*PVD                | -0.12753 | 0.129194 | -0.38075 | 0.125685 | 0.324   |
| OTHER*PVD                   | -0.02908 | 0.08621  | -0.19805 | 0.139884 | 0.736   |
| Rheumatologic disease       | -0.15317 | 0.043461 | -0.23835 | -0.06799 | <0.0001 |
| Renal disease               | 0.070712 | 0.027322 | 0.017163 | 0.124261 | 0.01    |
